# Supplementary material for: Nanobody repertoire generated against the spike protein of ancestral SARS-CoV-2 remains efficacious against the rapidly evolving virus
Source: eLife. 2024 May 7;12:RP89423. doi: 10.7554/eLife.89423 (PMC11076045; doi:10.7554/eLife.89423)
Supplement: Figure 2—source data 1. [file elife-89423-fig2-data1.xlsx]

## Sheet: Sheet1
Group #	Nanobody	wildtype#				Delta					Omicron BA.1					Omicron BA.4/5				Omicron XBB			Omicron BQ.1.1
		Kon	Koff	KD	PSV	Kon	Koff	KD	PSV	IC50 fold	Kon	Koff	KD	PSV	IC50 fold	Kon	Koff	KD	IC50	Kon	Koff	KD	Kon	Koff	KD
										change					change
		(M-1s-1)	(s-1)	(M)	IC50	(M-1s-1)	(s-1)	(M)	IC50	Wildtype/	(M-1s-1)	(s-1)	(M)	IC50	Wildtype/	(M-1s-1)	(s-1)	(M)	(nM)	(M-1s-1)	(s-1)	(M)	(M-1s-1)	(s-1)	(M)
					(s.e.m)				(s.e.m)	Delta				(s.e.m)	Omicron
					(nM)				(nM)					(nM)	BA.1
I	S1-1	650000	5.98e-07	9.2e-12	6.7(1.0)	1270000	1e-06	7.87e-13	2.3(0.5)	2.91	No binding			NA		No binding				Not tested			Not tested
	S1-RBD-9	285000	0.000123	4.3e-10	235(97.5)	(1)3.93E+05	(1)1.00E-03	5.69E-10*	85.2	2.76	6050	0.000182	3.01e-08	323	0.73	436000	0.00549	1.26e-08	966	6.31DE+05	0.00541	8.58e-09	2650000	0.0108	4.06e-09
						(2)1.76E-03	(2)5.04E-04		-24.3					-20.8					-220
	S1-RBD-15	7520000	0.000495	6.58e-11	4.6(1.2)	2550000	0.000108	4.25e-11	2(0.9)	2.3	1950000	0.0132	6.79e-09	617(87)	0.01	No binding				Not tested			Not tested
	S1-RBD-22	924000	0.000442	4.78e-10	100(0.1)	(1)1.07E+06	(1)6.25E-04	1.83E-10*	46.4(12)	2.16	730000	0.000191	2.62e-10	179(68)	0.56	1070000	0.0105	9.8e-09	976	422000	0.00361	8.57e-09	566000	0.00309	5.46e-09
						(2)9.10E-04	(2)4.15E-04												-285
	S1-RBD-24	2120000	0.00122	5.75e-10	221(4)	(1)5.74E+05	(1)2.62E-03	1.64E-09*	85.5	2.58	(1)2.66E+05	(1)1.49E-02	1.34E-08*	2382	0.09	925000	0.0162	1.75e-08	NA	Not tested			Not tested
						(2)1.61E-03	(2)9.00E-04		-13.5		(2)2.63E-03	(2)8.24E-04		-878
II	S1-6	592000	0.000369	6.22e-10	56.1(20.7)	319000	0.000248	7.77e-10	37.3 (14.7)	1.5	No binding			NA	NA	No binding			NA	Not tested			Not tested
	S1-35	2700000	9.77e-05	3.62e-11	12.5(0.1)	583000	1.48e-05	2.54e-11	28(5.2)	0.45	520000	7.56e-05	1.45e-10	49(13.6)	0.25	1020000	4.35e-05	4.27e-11	182(55)	929000	0.000285	3.07e-10	1210000	7.45e-05	6.17e-11
	S1-39	1680000	0.00106	6.3e-10	111(4.0)	2300000	0.000673	2.92e-10	236(3.8)	0.47	(1)1.14E+05	(1)5.48E-03	3.62E-09*	NA	NA	75900	0.00073	9.61e-09	NA	No binding			No binding
											(2)5.04E-03	(2)4.12E-04
III	S1-23	1090000	0.000107	9.78e-11	5.7(2.2)	233000	0.00285	1.23e-08	NA		No binding			NA	NA	No binding			NA	No binding			No binding
	S1-36	7870000	0.00172	2.18e-10	48.5(21.1)	(1)7.90E+05	(1)2.28E-02	9.00E-09*	1387	0.03	(1)1.19E+06	(1)1.64E-02	3.47E-09*	NA	NA	No binding			NA	Not tested			Not tested
						(2)2.11E-03	(2)9.57E-04		-209		(2)2.02E-03	(2)6.80E-04
	S1-RBD-40	747000	2.77e-05	3.71e-11	25.6(5.9)	No binding			NA		225000	3.71e-05	1.65e-10	46.1	0.55	(1)2.54E+04	(1)3.07E-01	4.17E-06*	NA<10uM	435000	0.0124	2.86e-08	1240000	0.00611	4.92e-09
														-4.7		(2)6.23E-03	(2)3.29E-03
	S1-37	4030000	0.000275	6.82e-11	6.8(0.7)	118000	0.00135	1.14e-08	NA		1380000	0.0199	1.44e-08	NA	NA	No binding			NA	Not tested			Not tested
	S1-48	2610000	6.22e-05	2.39e-11	5.82(0.5)	574000	0.00354	6.18e-09	145(5)	0.04	No binding			NA	NA	No binding			NA	Not tested			Not tested
IV	S1-RBD-21	3150000	0.00171	5.45e-10	17.3(3.1)	(1)1.82E+06	(1)1.98E-03	3.18E-10*	21(1.3)	0.82	(1)1.90E+05	(1)3.16E-03	5.80E-09*	113(14)	0.15	No binding			NA	Not tested			Not tested
						(2)8.40E-04	(2)3.48E-04				(2)2.17E-03	(2)1.16E-03
	S1-RBD-27	6190000	0.0124	2e-09	163(71.4)	(1)4.06E+05	(1)1.48E-02	8.24E-09*	1390	0.12	No binding			NA	NA	No binding			NA	Not tested			Not tested
						(2)5.17E-03	(2)1.51E-03		-198
	S1-RBD-29	536000	0.00135	2.51e-09	9.53(1.0)	(1)1.80E+05	(1)6.99E-03	1.69E-08*	564(332)	0.02	33000	0.00012	3.63e-09	NA	NA	No binding			NA	Not tested			Not tested
						(2)9.46E-04	(2)7.32E-04
	S1-RBD-43	621000	0.000182	2.92e-10	33.6(1.3)	5390000	0.00119	2.21e-10	NA		479000	0.000423	8.83e-10	1032(543)	0.03	No binding				Not tested			Not tested
	S1-RBD-46	469000	0.000579	1.23e-09	48	1110000	0.000312	2.81e-10	8.7(3)	5.52	No binding			NA	NA	(1)2.17E+05	(1)1.38E-01	1.31E-07*	1020	284000	0.0506	1.78e-07	190000	0.0365	1.92e-07
																(2)1.60E-02	(2)4.15E-03
	S1-RBD-49	315000	0.000534	1.69e-09	37.6(5.6)	No binding					254000	0.000348	1.37e-09	404 (145)	0.09	No binding			NA	Not tested			Not tested
V	S1-RBD-16	16800	6.25e-05	3.73e-09	79.2(4.2)	31300	0.000304	9.74e-09	688	0.12	No binding			690(150)	0.11	No binding			8500(2300)	Not tested			Not tested
									-72.6
	S1-RBD-23	2890000	4.61e-05	1.59e-11	7.31(0.4)	No binding			NA		791000	5.43e-05	6.87e-11	91.7	0.08	No binding			NA	Not tested			Not tested
														-5.2
	S1-RBD-38	1120000	0.000984	8.79e-10	84.6(22.7)	No binding			NA		237000	0.000706	2.98e-09	790	0.11	No binding			NA<10uM	Not tested			Not tested
														-146
VI	S1-RBD-35	1330000	0.00025	1.88e-10	12.3(2.4)	No binding					No binding					No binding				Not tested			Not tested
VII	S1-46	222000	0.00017	7.66e-10	312(14.0)	69300	4.05e-05	5.85e-10	210.2	1.49	212000	0.000124	5.85e-10	412	0.76	127000	0.000107	8.46e-10	NA<10uM	50100	0.000188	3.75e-09	54400	0.000199	3.65e-09
									-26					-116
VIII	S1-65	1060000	0.000167	1.57e-10	7.3(6.0)	Not tested			NA		342000	0.00105	3.07e-09	517	0.01	No binding			NA	Not tested			Not tested
														-218
I/II	S1-4	1260000	0.000126	1.37e-10	41.5(3.7)	1380000	4.83e-05	3.51e-11	10.7(0.4)	3.88	600000	7.98e-05	1.33e-10	58.6 (9.2)	0.71	1320000	0.00132	1e-09	148.6(37.6)	1270000	0.0011	8.66e-10	1300000	0.00138	1.06e-09
I/IV	S1-RBD-3	512000	0.0101	1.98e-08	384(18.7)	(1)3.27E+05	(1)5.54E-03	5.32E-09*	83.9	4.58	No binding			NA	NA	Not tested				Not tested			Not tested
						(2)1.62E-03	(2)7.42E-04
	S1-RBD-5	7210000	0.00105	1.45e-10	174(3.3)	1490000	0.000329	2.2e-10	280	0.62	(1)1.18E+05	(1)4.32E-03	7.75E-09*	204	0.85	1190000	0.00971	8.19e-09	NA	2060000	0.00397	1.93e-09	2330000	0.00569	2.44e-09
											(2)2.95E-03	(2)7.96E-04		-24.6
	S1-RBD-6	3480000	0.00113	3.24e-10	77.2(21.8)	(1)6.68E+05	(1)5.04E-04	1.99E-10*	542.3	0.14	(1)1.43E+05	(1)3.44E-03	5.49E-9*	233.8	0.33	872000	0.00571	6.55e-09	NA	225000	0.00552	2.46e-08	225000	0.00494	2.19e-08
						(2)1.08E-03	(2)3.85E-04		-155		(2)3.37E-03	(2)9.96E-04		-23
#Values taken from (Mast, Fridy et al. 2021)
*Fit to a two-state mode
§S1-RBD-16 showed binding to omicron BA.1 and omicron BA.4/5 using ELISA
